# Supplementary material for: Highly porous nitrogen-doped carbon superstructures derived from the intramolecular cyclization-induced crystallization-driven self-assembly of poly(amic acid)
Source: Royal Society of Chemistry journal article supplement (doi:10.1039/d1na00853f), 2022-01-01
Supplement: d1na00853f1.pdf [file d1na00853f1.pdf]

**Electronic Supplementary Information for**  
**Highly Porous Nitrogen-Doped Carbon Superstructure**  
**Derived from the Intramolecular Cyclization-Induced**  
**Crystallization-Driven Self-Assembly of a Poly(amic acid)**

Hui Sun<sup>\*a</sup>, Xiao Li<sup>a</sup>, Kai Jin<sup>a</sup>, Xiaoyong Lai<sup>\*a</sup> and Jianzhong Du<sup>\*b</sup>

<sup>a</sup>State Key Laboratory of High-efficiency Coal Utilization and Green Chemical Engineering, Ningxia University, Yinchuan 750021, China E-mail: sunhui@nxu.edu.cn, xylai@nxu.edu.cn.

<sup>b</sup>School of Materials Science and Engineering, Tongji University, Shanghai 201804, China E-mail: jzdu@tongji.edu.cn.

## 1. Schemes and Figures

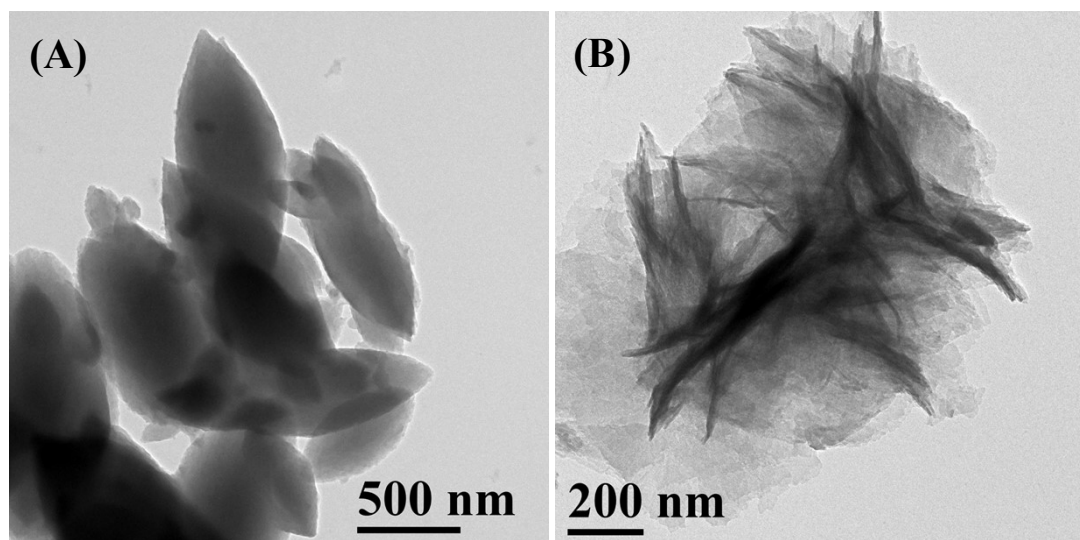

Fig. S1. Nano-objects with various morphologies prepared from ICI-CDSA of PAA. (A) PAA solution in DMF incubated at 153 °C for 10 min and (B) PAA solution solvothermal treated at 140 °C for 24 h.

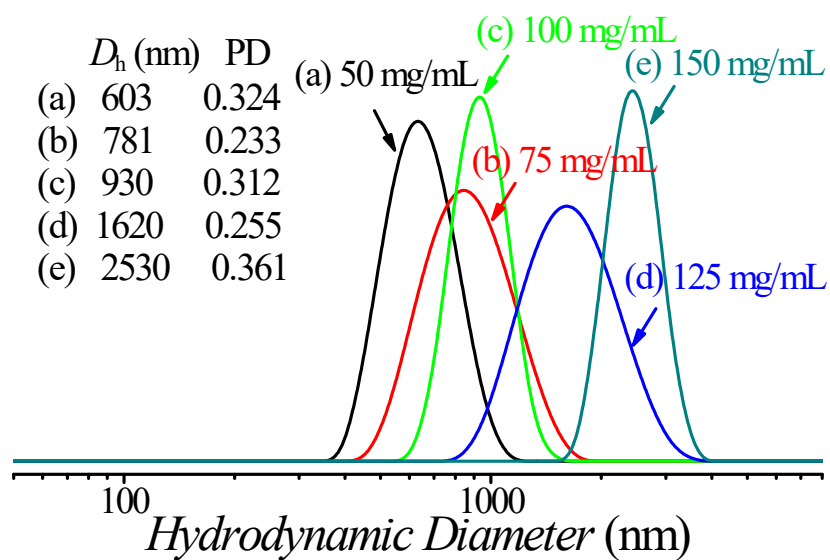

Fig. S2. DLS results of the nano-objects obtained from the ICI-CDSA of PAA in DMF at different concentrations.

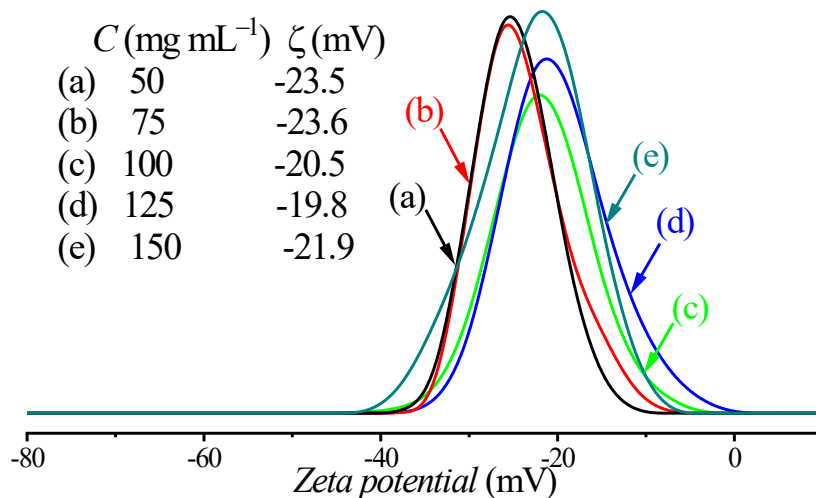

Fig. S3. Zeta potentials of the nano-objects obtained from the ICI-CDSA of PAA in DMF at different concentrations.

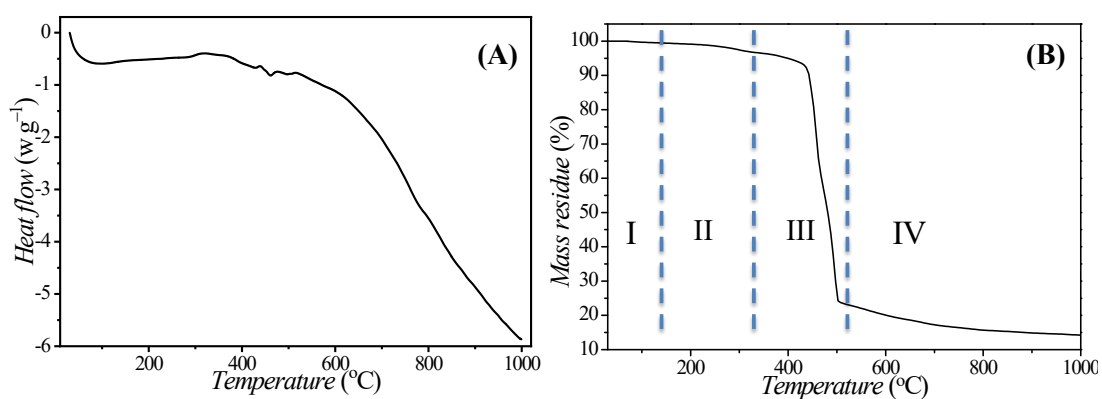

Fig. S4. (A) Differential scanning calorimetry (DSC) and (B) thermogravimetry (TG) results of the hourglass-shaped superstructures pyrolyzed at nitrogen atmosphere.

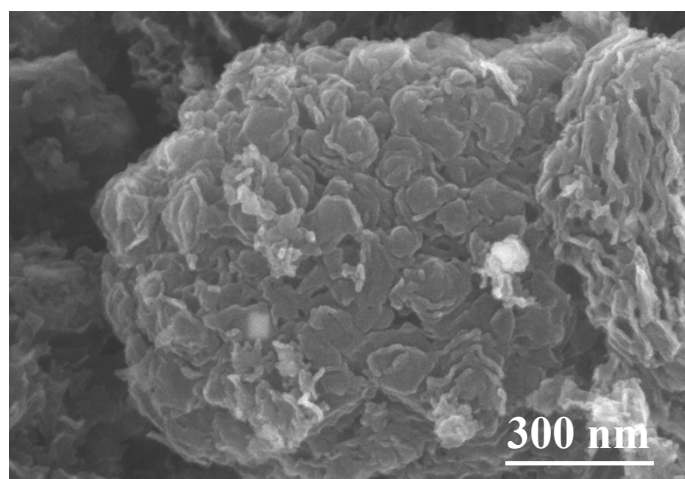

Fig. S5. SEM image of N-CSs, confirming that the N-CSs was formed by carbon nanosheets.

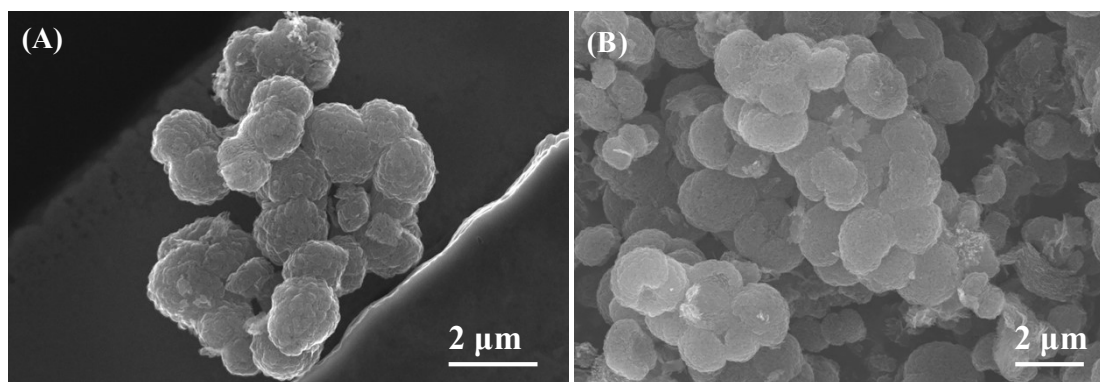

Fig. S6. SEM images of N-CSs by the pyrolysis of hourglass-shaped superstructures at (A) 700 and (B) 900 °C.

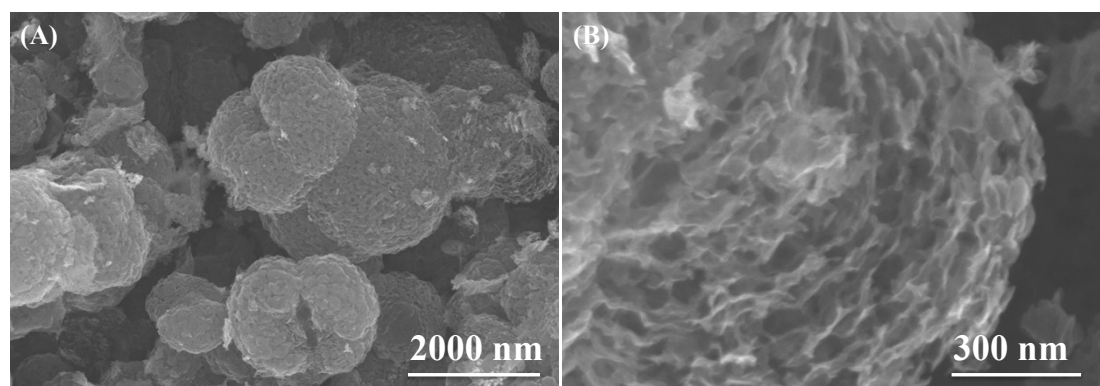

Fig. S7. Insight into the inner structure of N-CSs. (A) and (B) SEM images of N-CSs at different magnification.

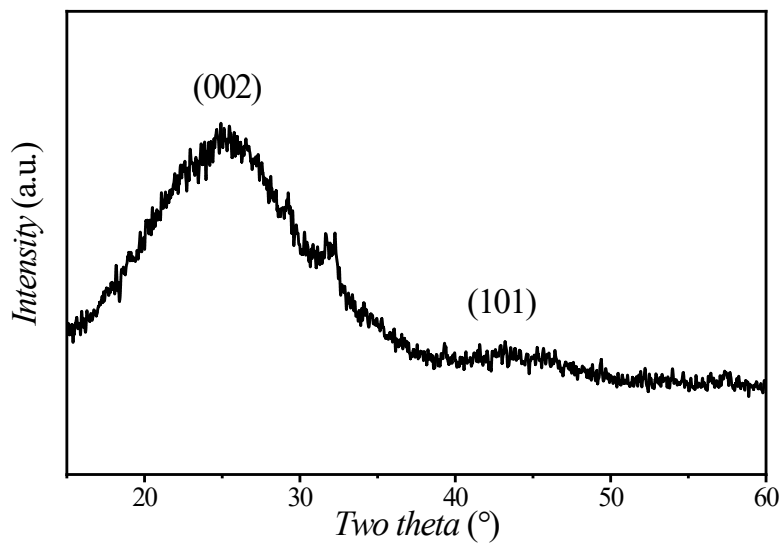

Fig. S8. XRD pattern of N-CSs.

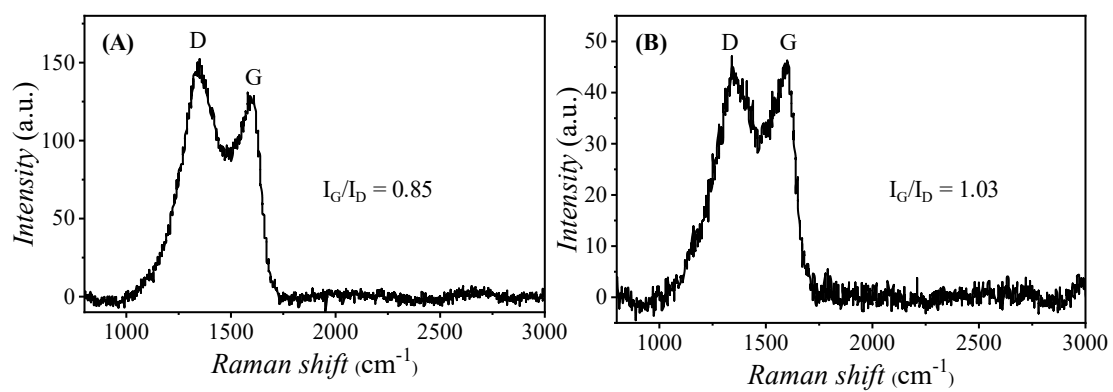

Fig. S9. Raman spectra of N-CSs pyrolyzed at (A) 700 and (B) 900 °C.

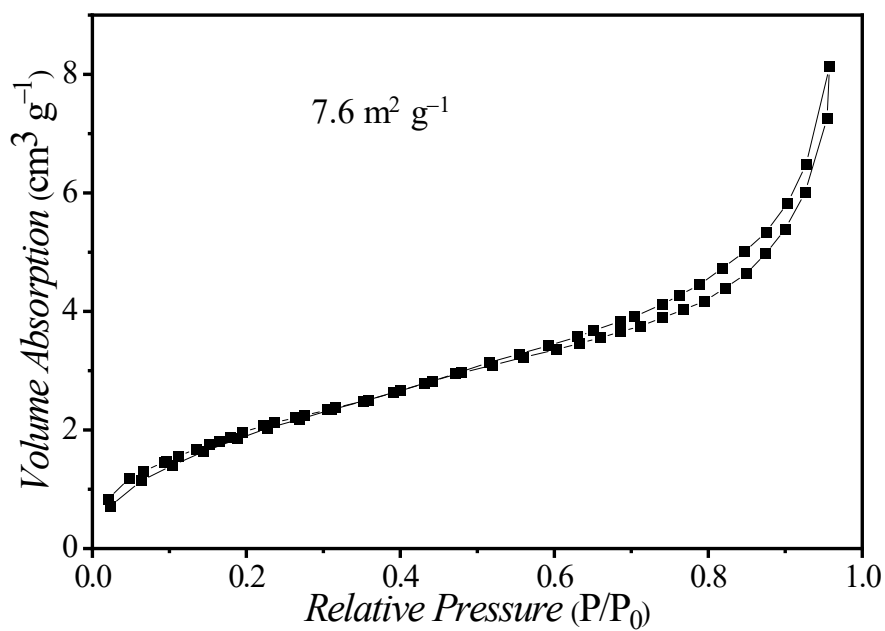

Fig. S10. Nitrogen adsorption/desorption isotherm of hourglass-shaped superstructures.

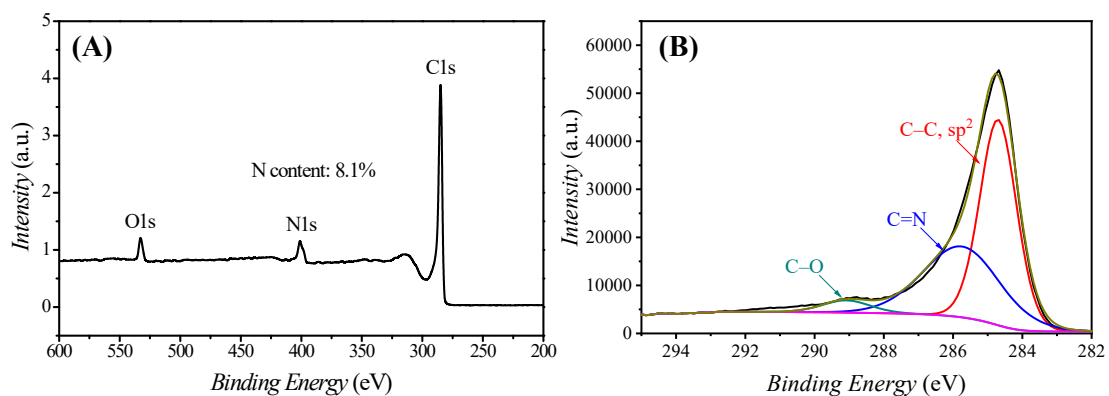

Fig. S11. XPS results of N-CSs. (A) Element contents and (B) high resolution spectrum of carbon.

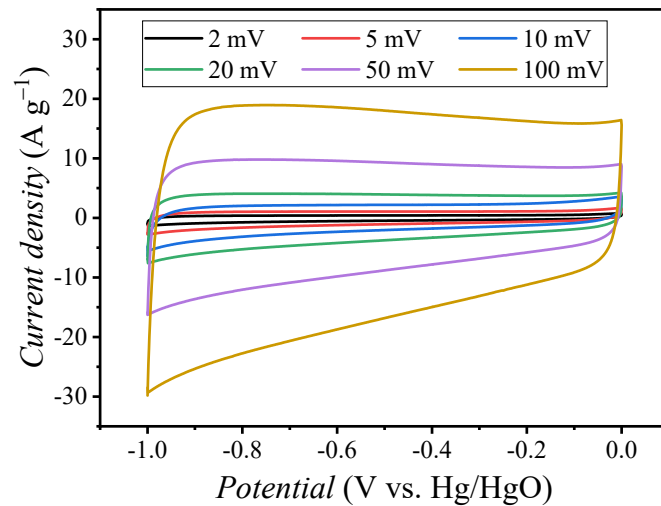

Fig. S12. CV curves of N-CSs at scan rates from 2 to 100 mV s<sup>-1</sup>.

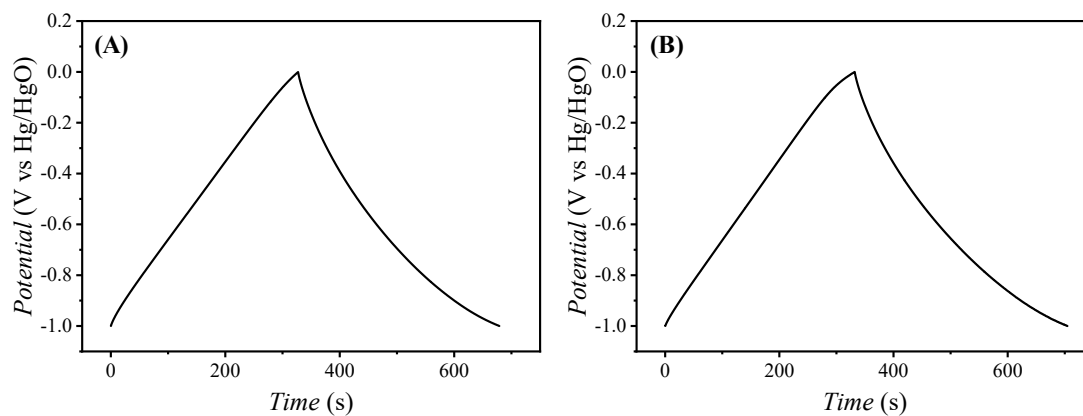

Fig. S13. GC curves of N-CSs pyrolyzed at (A) 700 and (B) 900 °C at a current density of 0.5 A g<sup>-1</sup>.

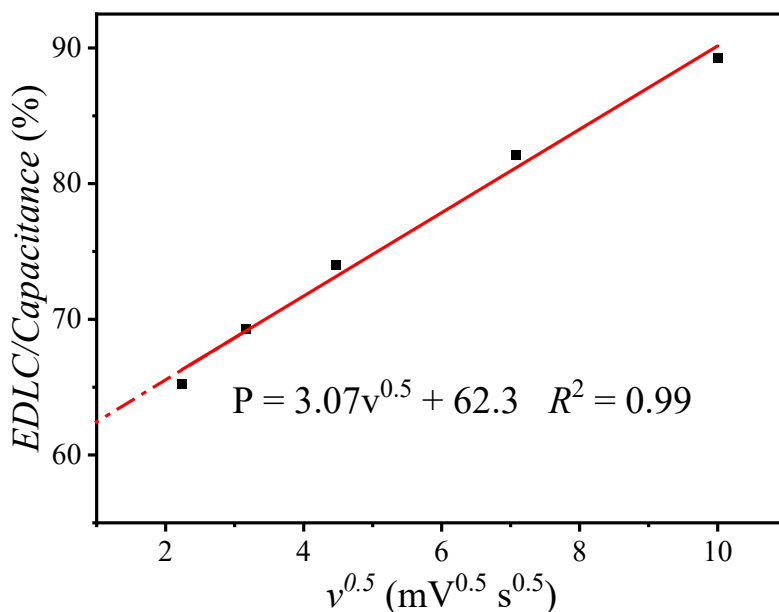

Fig. S14. The relationship between EDLC/capacitance of N-CSs and the square root of scan rate ( $v^{0.5}$ ).

#### Dunn's method<sup>1</sup>

Dunn's method provides a reliable way to calculate the capacitance contribution of the surface capacitive effects such as the EDL capacitive effects and the diffusion-controlled processes such as pseudocapacitive reactions. At a specific potential, the current density ( $i$ ) from the CV curves can be expressed as following:

$$i = k_1v + k_2v^{0.5} \quad (\text{I})$$

Where  $k_1v$  and  $k_2v^{0.5}$  represent the surface capacitive- and diffusion-controlled current contributions, respectively. Divided by  $v^{0.5}$  on both sides of equation I, and equation II was obtained.

$$iv^{-0.5} = k_1v^{0.5} + k_2 \quad (\text{II})$$

At a fixed potential, the  $iv^{-0.5}$  should have a linear relationship with the square root of scan rates ( $v^{0.5}$ ), and the slope of  $k_1$  and a y-intercept of  $k_2$  are obtained. The  $k_1v$  represents the surface capacitive-



controlled current contribution. At different potentials, a series of  $k_1$  and  $k_2$  could be calculated, and the corresponding surface capacitive-controlled current contributions are obtained.

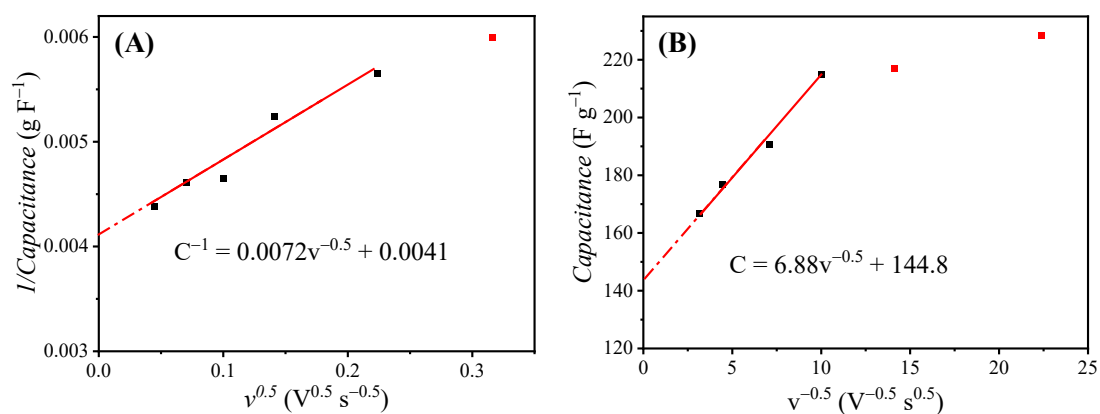

Fig. S15. Capacitance contribution analysis by Trasatti's method. (A) Relationship between the reciprocal of gravimetric capacitance ( $C^{-1}$ ) and the square root of scan rate ( $v^{0.5}$ ) and (B) relationship between gravimetric capacitance ( $C$ ) and the reciprocal of square root of scan rate ( $v^{-0.5}$ ).

### Trasatti's method <sup>1</sup>

The analysis of contribution of electrochemical double-layer capacitance (EDLC) and pseudocapacitance to the total capacitance by Trasatti's method refers to previous study.<sup>1</sup> Generally, the gravimetric capacitances ( $C$ ) of N-CSs at different scan rates were calculated according to equation III.

$$C = A/2mv\Delta V \quad \text{(III)}$$

Where  $A$  is the area of CV curve,  $m$  (g) is the quality of the N-CSs,  $v$  is the scan rate ( $\text{V s}^{-1}$ ), and  $\Delta V$  is the potential window.

The reciprocal of gravimetric capacitances ( $C^{-1}$ ) will have a linear relationship with the square root of scan rates ( $v^{0.5}$ ), assuming ion diffusion follows a semi-infinite diffusion pattern, as illustrated in equation IV.

$$C^{-1} = av^{0.5} + b \quad (IV)$$

Where  $b$  is the reciprocal of total gravimetric capacitance, in other words, the sum of EDLC and pseudocapacitance.

Similarly, the gravimetric capacitances ( $C^1$ ) will have a linear relationship with the reciprocal of square root of scan rates ( $v^{-0.5}$ ), like equation V.

$$C^1 = a'v^{-0.5} + b' \quad (V)$$

Where  $b'$  is the EDLC, and the pseudocapacitance could be obtained by subtracting EDLC from total gravimetric capacitance.

### Calculation of the utilization of N-6 and N-5 <sup>1-3</sup>

The calculation of the utilization of N-6 and N-5 is based on the results of the calculated pseudocapacitance. It is assumed that the pseudocapacitance is generated from the Faraday reaction of N-6 and N-5. The actual stored electric charge ( $Q_a$  (C)) by N-6 and N-5 was calculated to be:

$$Q_a = mC_p\Delta V \quad (VI)$$

Where  $m$  (g) is the quality of N-CSs,  $C_p$  ( $F g^{-1}$ ) is the pseudocapacitance.

While the theoretically stored electric charge ( $Q_t$ ) was calculated according to the following equation:

$$Q_t = 2(mW_{N5, N6} F)/M_N \quad (VII)$$

Where  $W_{N5, N6}$  is the weight percentage of N-5 and N-6 in N-CSs, F is Faraday constant ( $96485 \text{ C mol}^{-1}$ )

and  $M_N$  is the atomic weight of nitrogen.

Therefore, the utilization of N-5 and N-6 could be calculated by equation VIII.

$$X = Q_a/Q_t \quad (\text{VIII})$$

Table S1. Comparison of the structure parameters and electrochemical performances of N-doped carbon materials with literature results.

| Electrode Materials | Electrolyte <sup>a</sup> | $S_{\text{BET}}$ ( $\text{m}^2 \text{ g}^{-1}$ ) | Pore Width (nm)    | C ( $\text{F g}^{-1}$ ) <sup>b</sup> | C/ $S_{\text{BET}}$ ( $\mu\text{F cm}^{-2}$ ) | References |
|---------------------|--------------------------|--------------------------------------------------|--------------------|--------------------------------------|-----------------------------------------------|------------|
| GO@NMC-3            | 6 M KOH                  | 255                                              | 17                 | 231                                  | 90.6                                          | 1          |
| HCSs                | 6 M KOH                  | 923                                              | 3.9                | 535                                  | 57.2                                          | 4          |
| NG                  | 6 M KOH                  | 588                                              | 11.1               | 289                                  | 49.1                                          | 5          |
| H-NMC-2.5           | 6 M KOH                  | 537                                              | 14.8               | 227                                  | 42.3                                          | 6          |
| PA-850              | 6 M KOH                  | 753                                              | <0.8, 1.5          | 302                                  | 40.1                                          | 7          |
| PACNP-20            | 6 M KOH                  | 1317                                             | 2.1                | 362                                  | 27.5                                          | 8          |
| OMCNS               | 6 M KOH                  | 814                                              | 3.1                | 179                                  | 22.3                                          | 9          |
| N-CSs               | 6 M KOH                  | 2106                                             | ~ 2.3              | 398                                  | 18.9                                          | 10         |
| MCC-6H              | 6 M KOH                  | 1797                                             | <3.0, 10-30        | 301                                  | 16.8                                          | 11         |
| NHPC-800            | 6 M KOH                  | 1848                                             | 1.0-2.0, 2.0-100   | 260                                  | 14.1                                          | 12         |
| HLPC                | 6 M KOH                  | 2725                                             | 0.7-2.0, 2.0-3.4   | 342                                  | 12.6                                          | 13         |
| KPAC-800            | 6 M KOH                  | 2988                                             | 2.1, 2.5, 2.5-8.0  | 238                                  | 7.97                                          | 14         |
| N-CSs               | 6 M KOH                  | 381                                              | 1.0, 3.8, 7.1-38.6 | 279 <sup>c</sup>                     | 76.5                                          | This work  |

<sup>a</sup>The electrochemical measurements were conducted via a three-electrode system using 6 M KOH as electrolyte. <sup>b</sup>The specific capacitance was obtained at a current density of  $0.2 \text{ A g}^{-1}$  in previous studies.

<sup>c</sup>The specific capacitance of this work was obtained at a current density of  $0.5 \text{ A g}^{-1}$ .

## 2. References

- (1) Zhang, L.; Wang, T.; Gao, T.-N.; Xiong, H.; Zhang, R.; Liu, Z.; Song, S.; Dai, S.; Qiao, Z.-A. *CCS Chem.* **2020**, *2*, 870-881.
- (2) Wang, Y.; Song, Y.; Xia, Y. *Chem. Soc. Rev.* **2016**, *45*, 5925-5950.
- (3) Song, Y.; Li, L.; Wang, Y.; Wang, C.; Guo, Z.; Xia, Y. *Chemphyschem* **2014**, *15*, 2084-2093.
- (4) Chen, Z.; Cao, R.; Ge, Y.; Tu, Y.; Xia, Y.; Yang, X. *J. Power Sources* **2017**, *363*, 356-364.
- (5) Li, M.; Xue, J. *J. Phys. Chem. C* **2014**, *118*, 2507-2517.
- (6) Wei, J.; Zhou, D.; Sun, Z.; Deng, Y.; Xia, Y.; Zhao, D. *Adv. Funct. Mater.* **2013**, *23*, 2322-2328.
- (7) Huang, K.; Li, M.; Chen, Z.; Yao, Y.; Yang, X. *Electrochim. Acta* **2015**, *158*, 306-313.
- (8) Ma, C.; Li, Y.; Shi, J.; Song, Y.; Liu, L. *Chem. Eng. J.* **2014**, *249*, 216-225.
- (9) Yu, X.; Wang, J.-g.; Huang, Z.-H.; Shen, W.; Kang, F. *Electrochem. Commun.* **2013**, *36*, 66-70.
- (10) Gao, S.; Chen, Y.; Fan, H.; Wei, X.; Hu, C.; Luo, H.; Qu, L. *J. Mater. Chem. A* **2014**, *2*, 3317-3324.
- (11) Wang, T.; Sun, Y.; Zhang, L.; Li, K.; Yi, Y.; Song, S.; Li, M.; Qiao, Z.-A.; Dai, S. *Adv. Mater.* **2019**, *31*, 1807876.
- (12) Zhou, J.; Zhang, Z.; Xing, W.; Yu, J.; Han, G.; Si, W.; Zhuo, S. *Electrochim. Acta* **2015**, *153*, 68-75.
- (13) Liang, Q.; Ye, L.; Huang, Z.-H.; Xu, Q.; Bai, Y.; Kang, F.; Yang, Q.-H. *Nanoscale* **2014**, *6*, 13831-13837.
- (14) Cheng, P.; Gao, S.; Zang, P.; Yang, X.; Bai, Y.; Xu, H.; Liu, Z.; Lei, Z. *Carbon* **2015**, *93*, 315-324.
